# Supplementary material for: Functional status of microvascular vasomotion is impaired in spontaneously hypertensive rat
Source: PubMed Central journal article supplement (PMC5719042; doi:10.1038/s41598-017-17013-w), 2017-12-06
Supplement: 41598_2017_17013_MOESM1_ESM.pdf [file 41598_2017_17013_MOESM1_ESM.pdf]

## Supplementary Information

### Functional status of microvascular vasomotion is impaired in spontaneously hypertensive rat

Mingming LIU<sup>1</sup>, Xiaoyan ZHANG<sup>1</sup>, Bing WANG<sup>1</sup>, Qingbin WU<sup>1</sup>, Bingwei LI<sup>1</sup>, Ailing LI<sup>1,\*</sup>,  
Honggang ZHANG<sup>1,\*</sup> & Ruijuan XIU<sup>1</sup>

<sup>1</sup>Institute of Microcirculation, Key Laboratory of Microcirculation, Ministry of Health,  
Chinese Academy of Medical Sciences & Peking Union Medical College, Beijing 100005,  
China

#### \* Corresponding author A

Prof. Ailing LI

Institute of Microcirculation

Chinese Academy of Medical Sciences & Peking Union Medical College

No.5 Dong Dan San Tiao, Dongcheng District, Beijing, 100005, China

Phone: +86 10 65126407

Fax: +86 10 65251957

Email address: lialwork@imc.cams.cn

#### \* Corresponding author B

Prof. Honggang ZHANG

Institute of Microcirculation

Chinese Academy of Medical Sciences & Peking Union Medical College

No.5 Dong Dan San Tiao, Dongcheng District, Beijing, 100005, China

Phone: +86 10 65126407

Fax: +86 10 65251957

Email address: zhanghg1966126@163.com

#### Supplementary Data

Number of Supplementary Figures: 1

Number of Supplementary Tables: 1

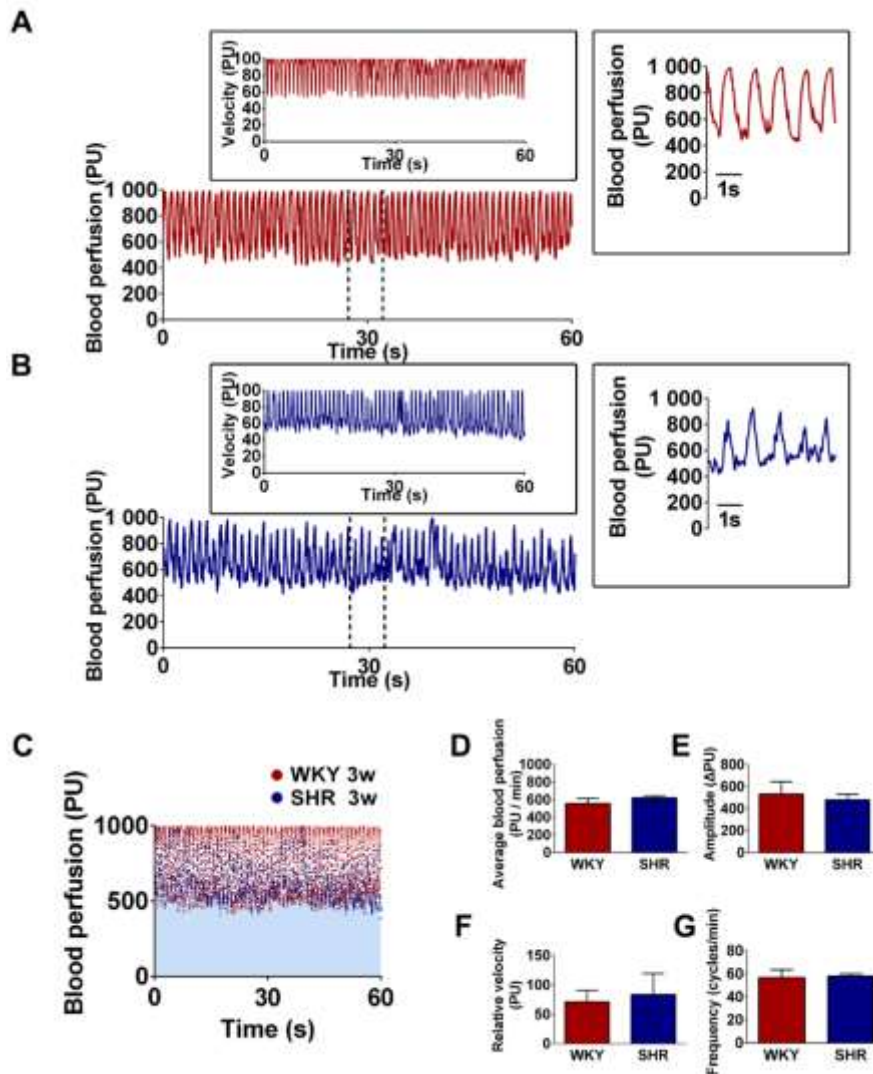

**Supplementary Figure S1. Functional status of pancreatic islet microvascular vasomotion in three-week-old SHR and WKYs.** (A) Functional status of pancreatic islet microvascular vasomotion in three-week-old WKYs. (B) Functional status of pancreatic islet microvascular vasomotion in three-week-old SHR. The dynamic velocity of microvascular blood flow was shown in the rectangular insert. The microvascular blood perfusion between the dashed lines (5 s) was extracted in the square insert. The red line represents microvascular blood perfusion data of three-week-old WKYs; the blue line represents perfusion data of three-week-old SHR; PU, perfusion unit. (C) Distribution patterns of pancreatic islet microvascular blood perfusion in three-week-old WKYs and SHR. The distribution pattern was analyzed using microvascular blood perfusion data derived from laser Doppler monitoring. Three-week-old WKYs and SHR showed similar blood perfusion pattern. Red dots, microvascular blood perfusion of three-week-old WKYs. Blue dots, microvascular blood perfusion of three-week-old SHR. PU, perfusion unit. (D-G) Quantification analysis of functional status of pancreatic islet microvascular vasomotion in three-week-old WKYs and SHR. No significantly differences were found in pancreatic islet microvascular vasomotion parameters (including average blood perfusion, amplitude, relative velocity and frequency) between three-week-old WKYs and SHR.

**Supplementary Table S1 Body weight, blood glucose and blood pressure of three-week-old WKYs and SHRs**

| Groups                 | WKYs<br>( <i>n</i> = 6) | SHRs<br>( <i>n</i> = 6) |
|------------------------|-------------------------|-------------------------|
| Age (weeks)            | 3                       | 3                       |
| Gender (male / female) | 6/0                     | 6/0                     |
| Body weight (g)        | 39.5 ± 1.3              | 42.7 ± 1.5              |
| FPG (mg/dL)            | 65.5 ± 4.4              | 62.4 ± 2.2              |
| Blood pressure (mmHg)  |                         |                         |
| SBP                    | 109.0 ± 1.5             | 128.0 ± 1.7 **          |
| DBP                    | 74.7 ± 6.0              | 89.7 ± 0.3              |
| MAP                    | 94.7 ± 6.1              | 107.3 ± 1.5             |

Unless indicated otherwise, numbers were expressed as the mean ± S.E.M. (*n* = 6 in each group). FPG, fasting plasma glucose; SBP, systolic blood pressure; DBP, diastolic blood pressure; MAP, mean arterial pressure. \*\*, *P* < 0.01 compared with WKYs.

Full-length blot of representative Western Blot images of Figure 3C

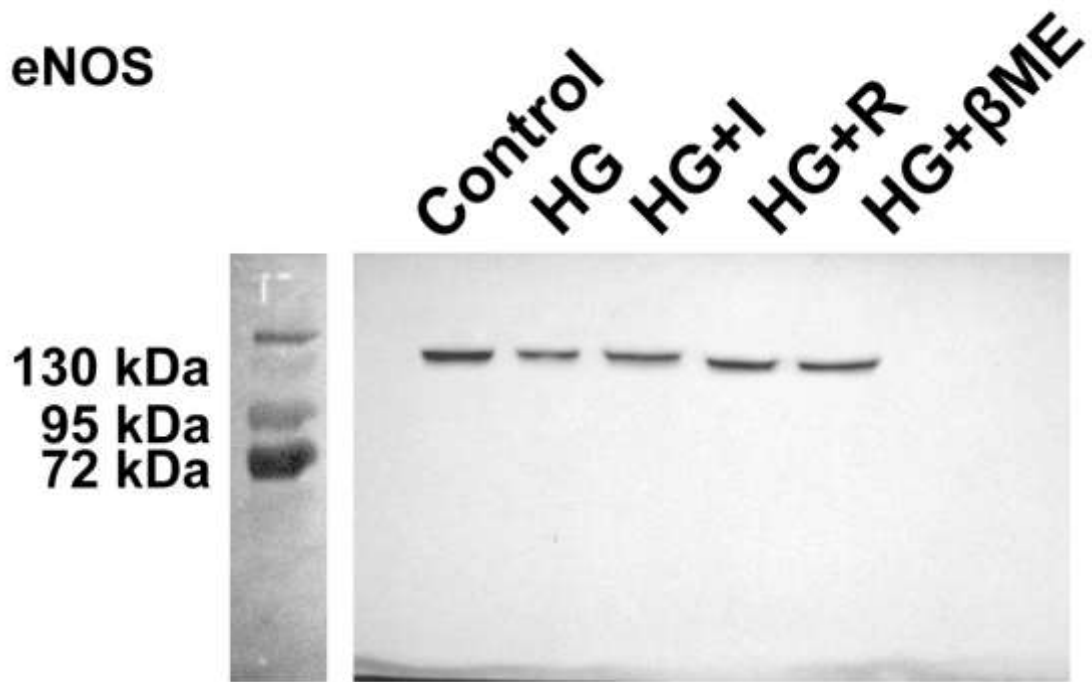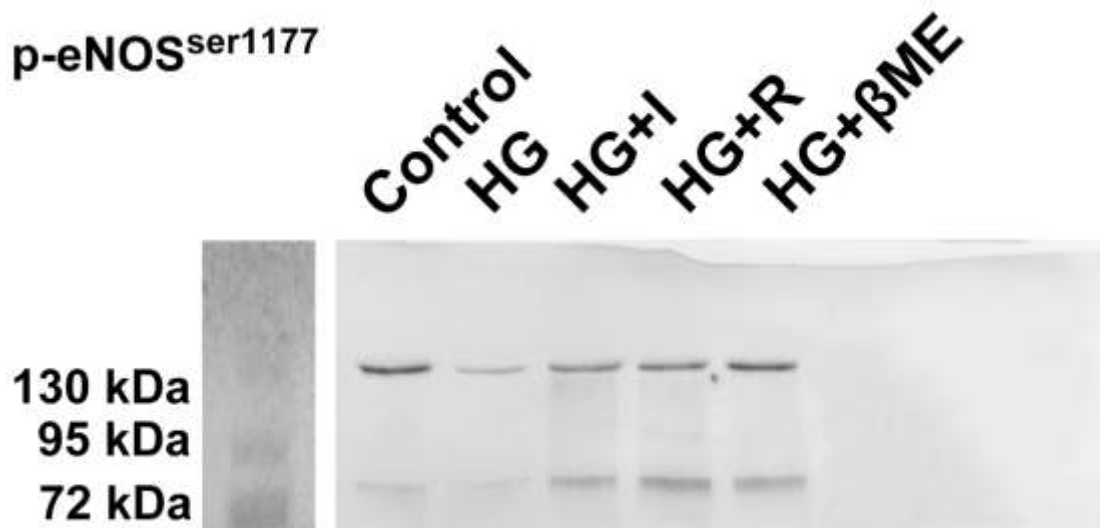

$\beta$ -actin

Control  
HG  
HG+I  
HG+R  
HG+ $\beta$ MME

72 kDa

43 kDa

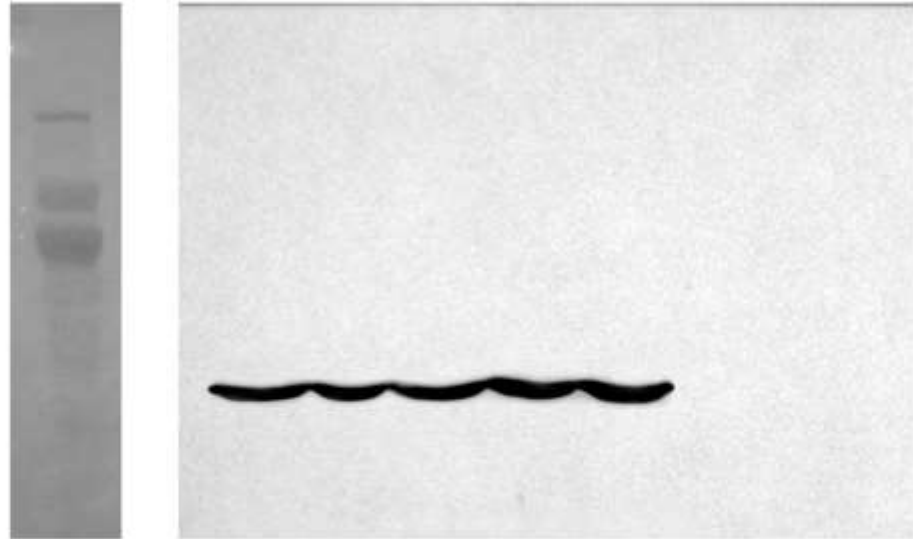

eNOS

Control  
HG  
HG+I  
HG+R  
HG+ $\beta$ MME

180 kDa

130 kDa

95 kDa

72 kDa

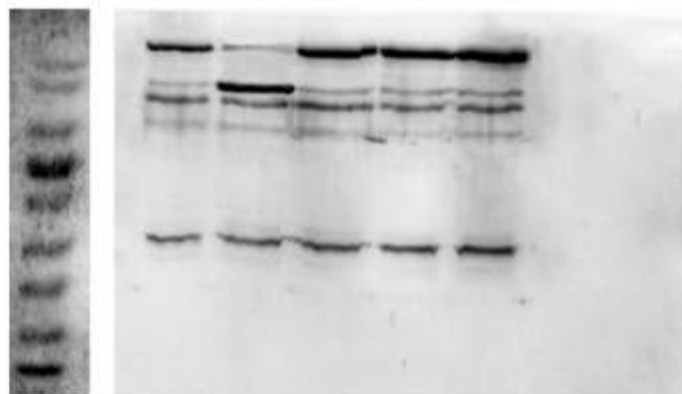

dimer  
monomer
